# Supplementary material for: Novel functions of the Arabidopsis transcription factor TCP5 in petal development and ethylene biosynthesis
Source: PubMed Central journal article supplement — Plant J. 2018 Apr 25;94(5):867–79. doi: 10.1111/tpj.13904 (PMC6001666; doi:10.1111/tpj.13904), 2018-04-25
Supplement: TPJ-94-867-s001.pdf [file TPJ-94-867-s001.pdf]

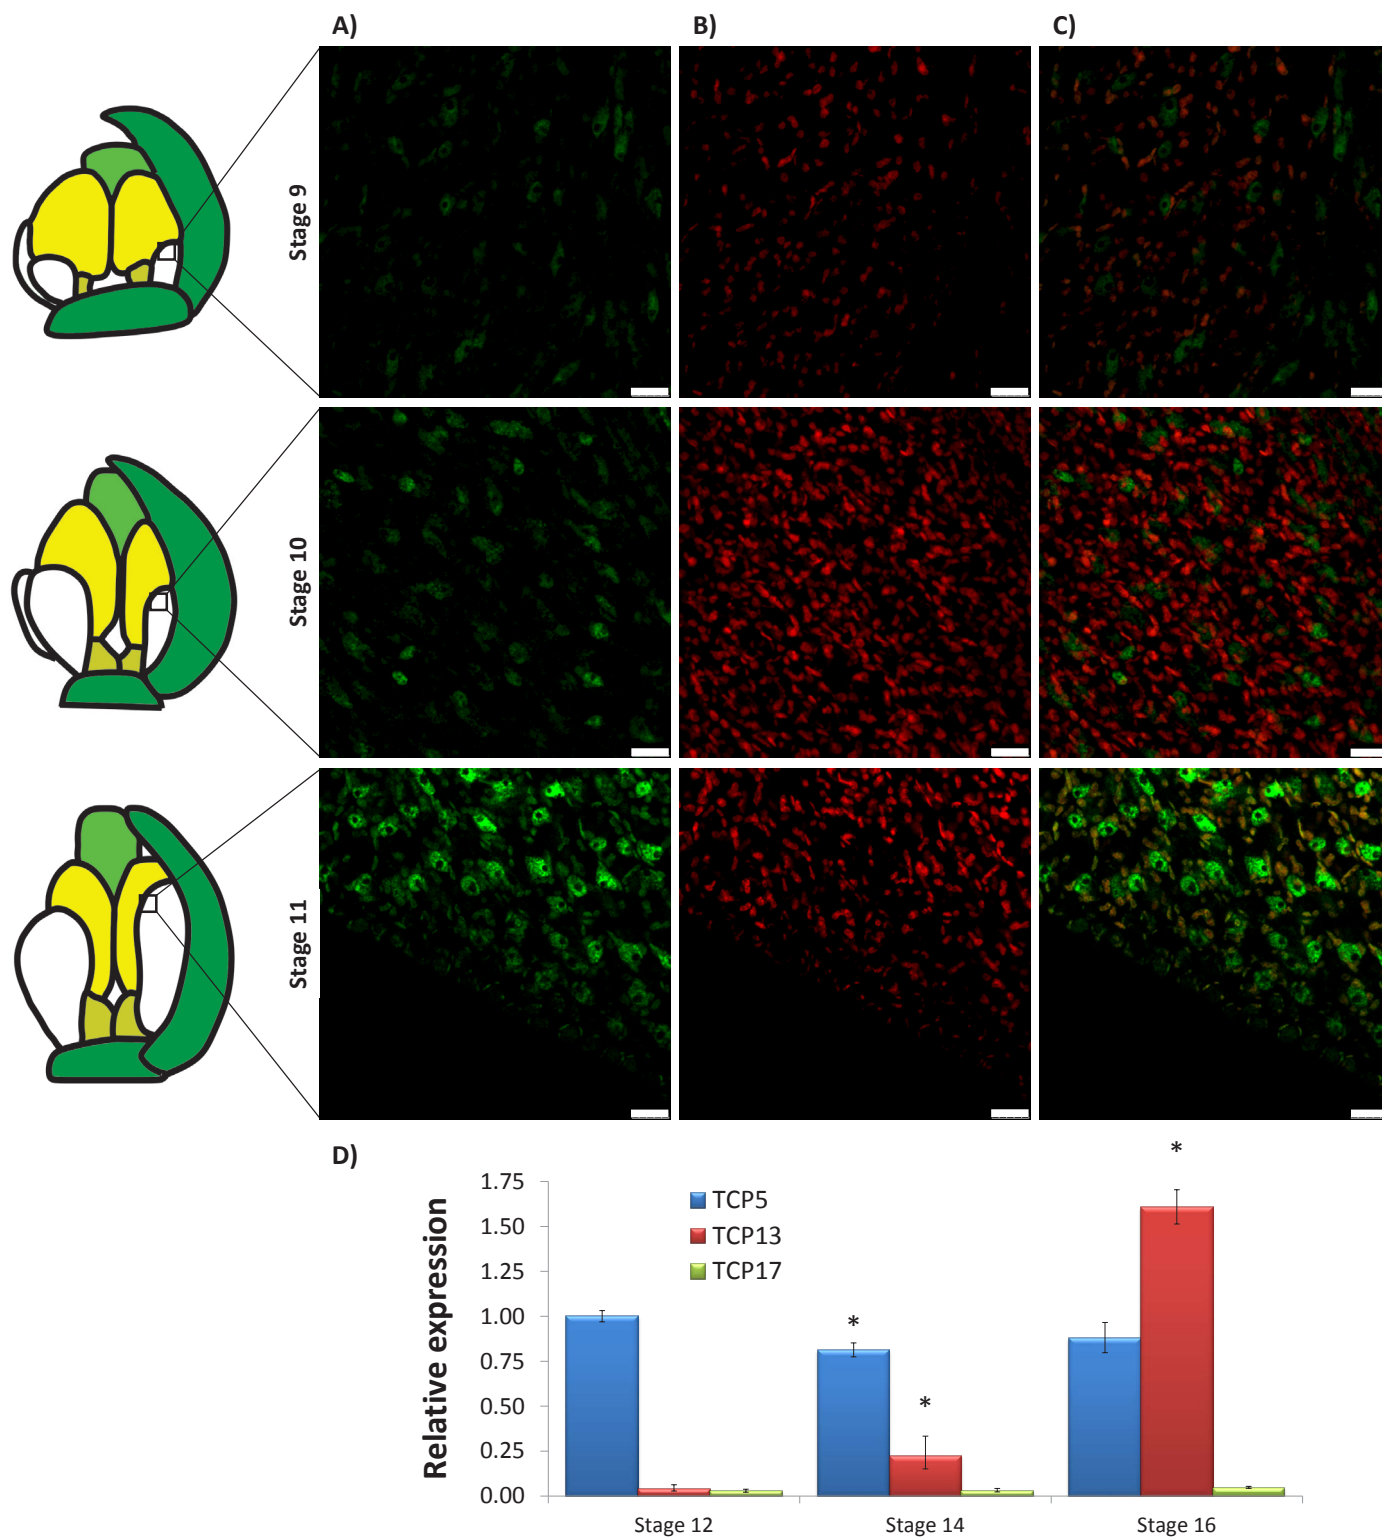

**Supplemental Figure 1.** Expression pattern of TCP5 in Arabidopsis petals during early and later stages of flower development.

**(A-C)** Confocal microscopy of GFP-tagged TCP5 in the distal part of the petal. The GFP fluorescence can be seen as a green signal in **(A)**, while the autofluorescence of chromo and/or chloroplasts is shown in red **(B)**. The overlay is shown in **(C)**, highlighting the nuclear localization of the GFP signal. **(D)** shows qRT-PCR analysis of cDNA of wild type petals from stage 12 (flowers close to anthesis), stage 14 (fully opened flowers) and stage 16 (senescing flower). The y-axis shows the relative expression with *TIP41* used as housekeeping gene for normalisation. The expression of *TCP13* and *TCP17* is scaled to the relative expression of *TCP5*. Asterisks indicate significantly different expression compared to expression at stage 12 using three biological replicates (Student's, t-test  $p < 0.05$ ). The stages and graphic representation thereof are according to Smyth et al. (1990). Scale bars in **(A-C)** are 7.5  $\mu\text{m}$ .
