# Supplementary material for: Novel functions of the Arabidopsis transcription factor TCP5 in petal development and ethylene biosynthesis
Source: PubMed Central journal article supplement — Plant J. 2018 Apr 25;94(5):867–79. doi: 10.1111/tpj.13904 (PMC6001666; doi:10.1111/tpj.13904), 2018-04-25
Supplement: TPJ-94-867-s002.pdf [file TPJ-94-867-s002.pdf]

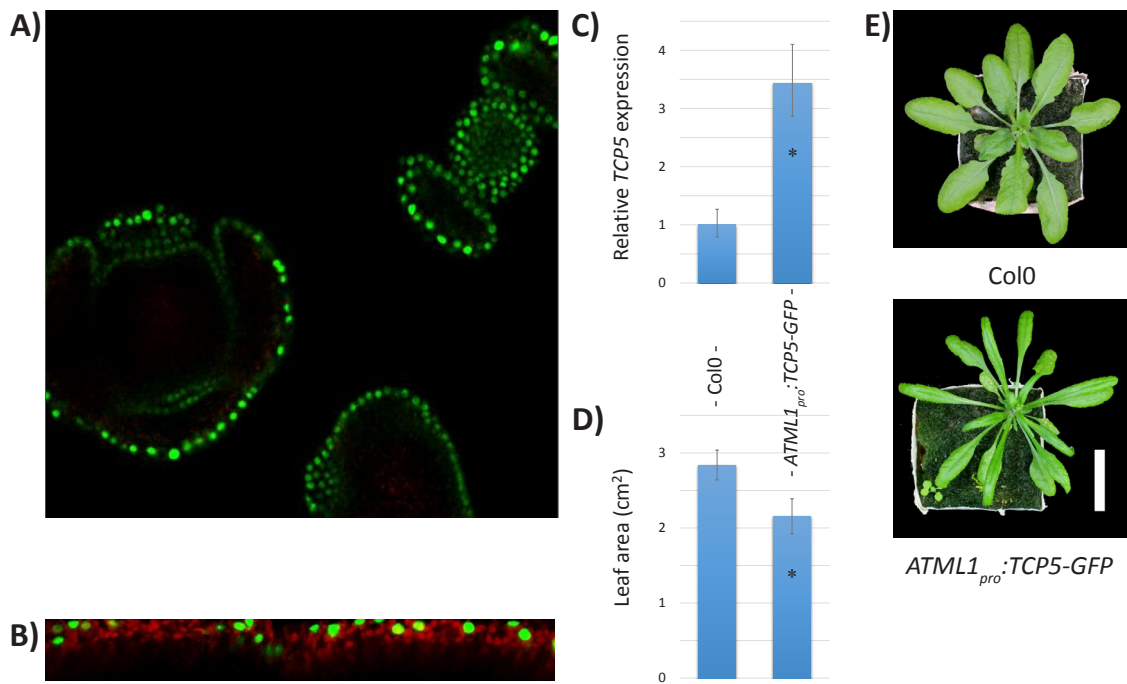

**Supplemental Figure 2.** Construction, expression and leaf phenotype of *ATML1<sub>pro</sub>:TCP5-GFP*.

**(A)** Confocal images showing the spatial expression pattern of *ATML1<sub>pro</sub>:TCP5-GFP* in young buds and **(B)** the epidermal specificity due to nuclear entrapment in the abaxial leaf epidermis. **(C)** shows the relative overexpression of TCP5 in *ATML1<sub>pro</sub>:TCP5-GFP* compared to wild type using three biological replicates. **(D)** quantification of leaf area (N=25), **(E)** overview of the leaf phenotype (bar = 1cm). An asterisk in figures (C) and (D) indicates a significant difference compared to wild type (Student's t-test,  $p < 0.05$ )
