# Supplementary material for: Novel functions of the Arabidopsis transcription factor TCP5 in petal development and ethylene biosynthesis
Source: PubMed Central journal article supplement — Plant J. 2018 Apr 25;94(5):867–79. doi: 10.1111/tpj.13904 (PMC6001666; doi:10.1111/tpj.13904), 2018-04-25
Supplement: TPJ-94-867-s003.pdf [file TPJ-94-867-s003.pdf]

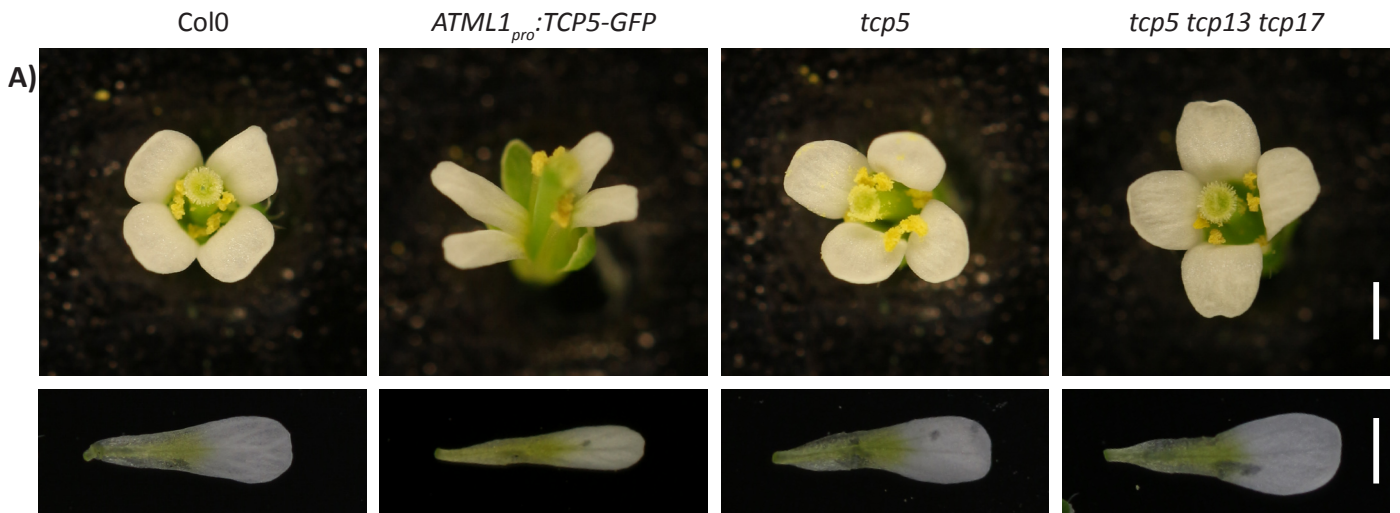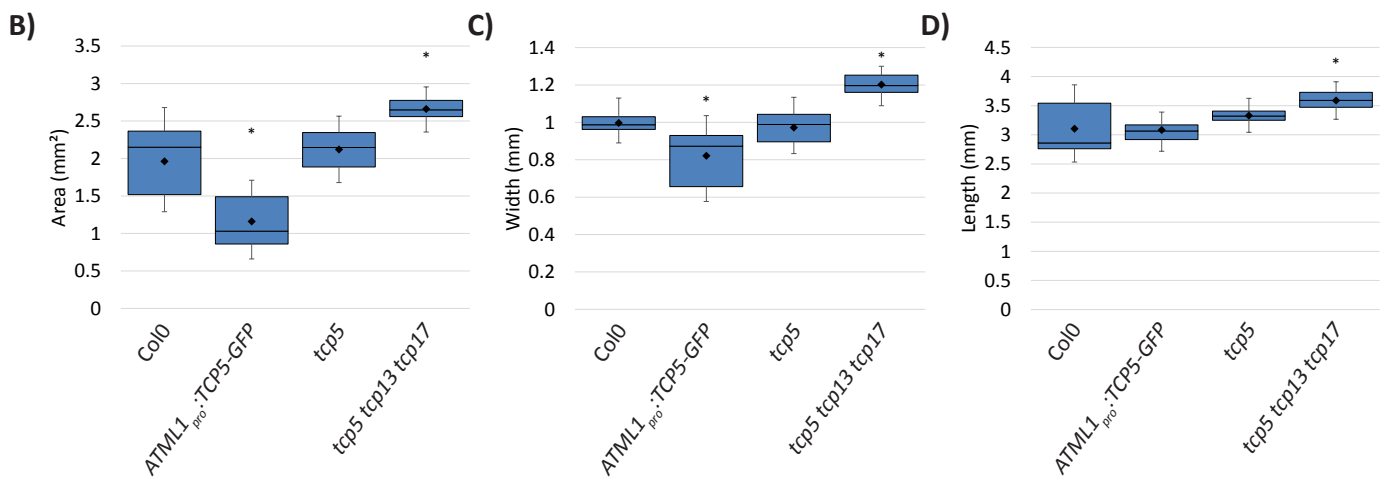

**Supplemental Figure 3.** Floral phenotypes in TCP5 overexpression and mutant lines.

**(A)** Overview of flower and petal phenotypes of Col0, *ATML1<sub>pro</sub>::TCP5-GFP*, *tcp5* and *tcp5 tcp13 tcp17* mutant plants. Scale bar is 1 mm. Detailed analysis of petal area **(B)**, width **(C)** and length **(D)** represented by boxplots. The marker represents the average, an asterisk indicates a significant difference (Student's t-test,  $p < 0.05$ ) compared to wild type Col0 (N=36).
