# Supplementary material for: Novel functions of the Arabidopsis transcription factor TCP5 in petal development and ethylene biosynthesis
Source: PubMed Central journal article supplement — Plant J. 2018 Apr 25;94(5):867–79. doi: 10.1111/tpj.13904 (PMC6001666; doi:10.1111/tpj.13904), 2018-04-25
Supplement: TPJ-94-867-s004.pdf [file TPJ-94-867-s004.pdf]

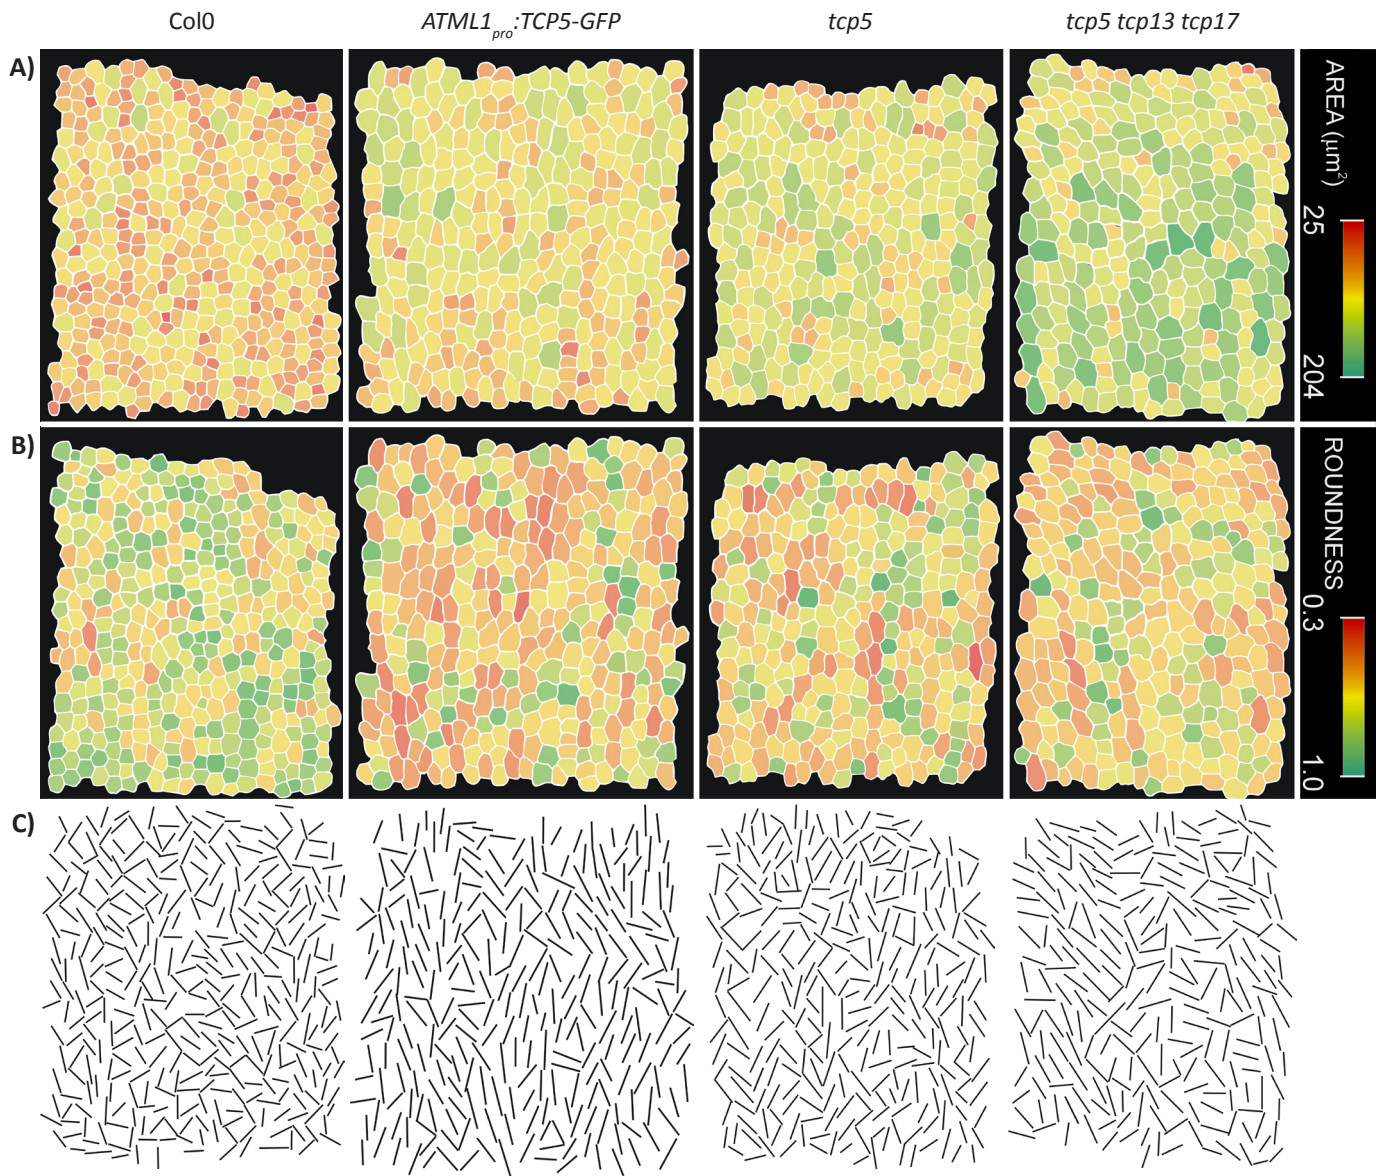

**Supplemental Figure 4.** Graphic representation accompanying the cell morphology phenotyping.

Cell area **(A)**, roundness **(B)** and the direction of cell elongation by vector in **(C)**.
