# Supplementary material for: Novel functions of the Arabidopsis transcription factor TCP5 in petal development and ethylene biosynthesis
Source: PubMed Central journal article supplement — Plant J. 2018 Apr 25;94(5):867–79. doi: 10.1111/tpj.13904 (PMC6001666; doi:10.1111/tpj.13904), 2018-04-25
Supplement: TPJ-94-867-s008.pdf [file TPJ-94-867-s008.pdf]

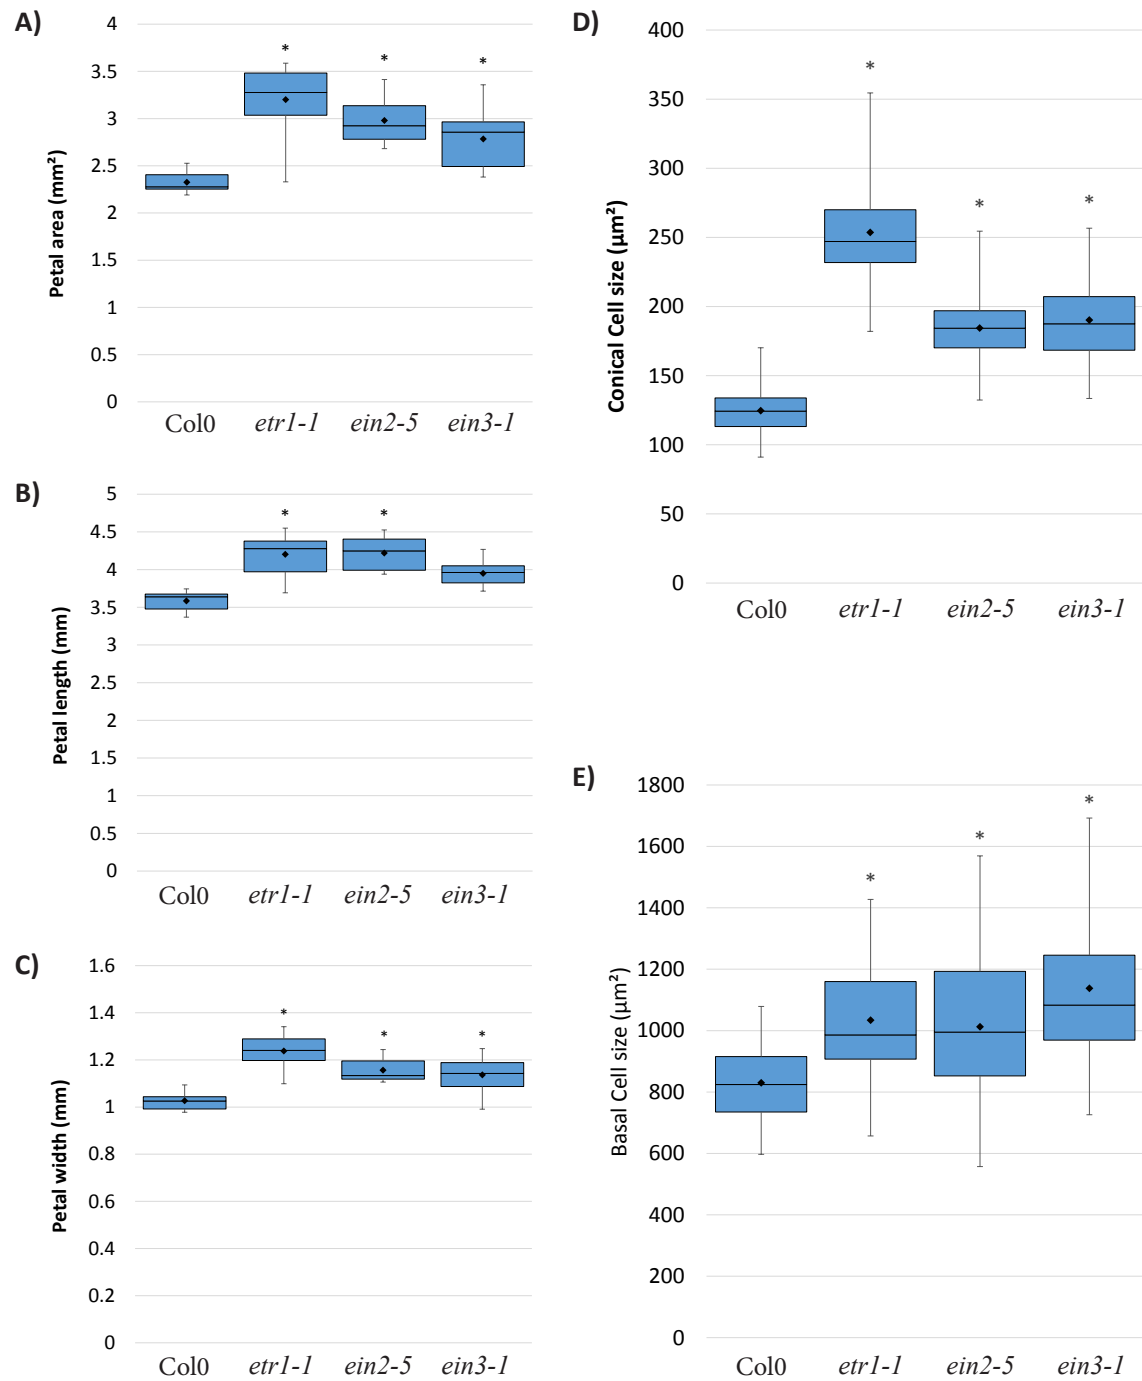

**Supplemental Figure 8.** Phenotypical alterations in petals of mutants deficient in ethylene reception and signal transduction.

Quantification of petal area **(A)**, length **(B)** and width **(C)**. Quantification of cell size is shown for conical petal cells **(D)** and basal cells **(E)**. Asterisks indicate a significant difference between Col0 wild type and the respective mutants, *etr1-1*, *ein2-5* and *ein3-1* ( $p < 0.05$ ,  $N=36$ ).
